# Supplementary material
Source: publisher site journal article supplement (https://www.dovepress.com/article/225365)
Supplement: Supplementary file 1 [file get_supplementary_file.php]

**Supplementary table 1** Relationship between serum AAT levels and the causes of mortality of the subjects with COPD during entire 10 years

|  | AAT <116 | AAT 116 to ≤141 | AAT >141 |
| --- | --- | --- | --- |
| Number of all mortalities, N | 22 | 54 | 36 |
| Respiratory diseases, N (%) | 10 (45) | 16 (30) | 19 (53) |
| Lung cancer, N (%) | 5 (23) | 13 (24) | 6 (17) |
| Other cancer, N (%) | 3 (14) | 8 (15) | 7 (19) |
| Cardiovascular diseases, N (%) | 1 (5) | 9 (17) | 2 (6) |
| Other reasons, N (%) | 3 (14) | 8 (15) | 2 (6) |

p = 0.34 by Fisher’s exact test

**Abbreviations:** AAT, alpha-1 antitrypsin

**
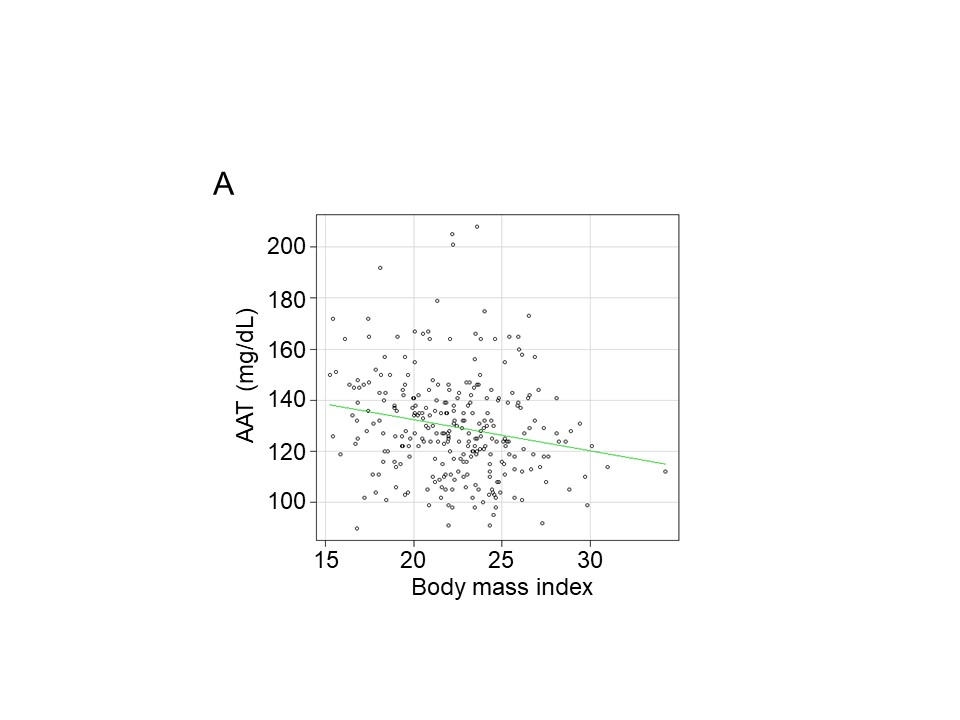
**

**
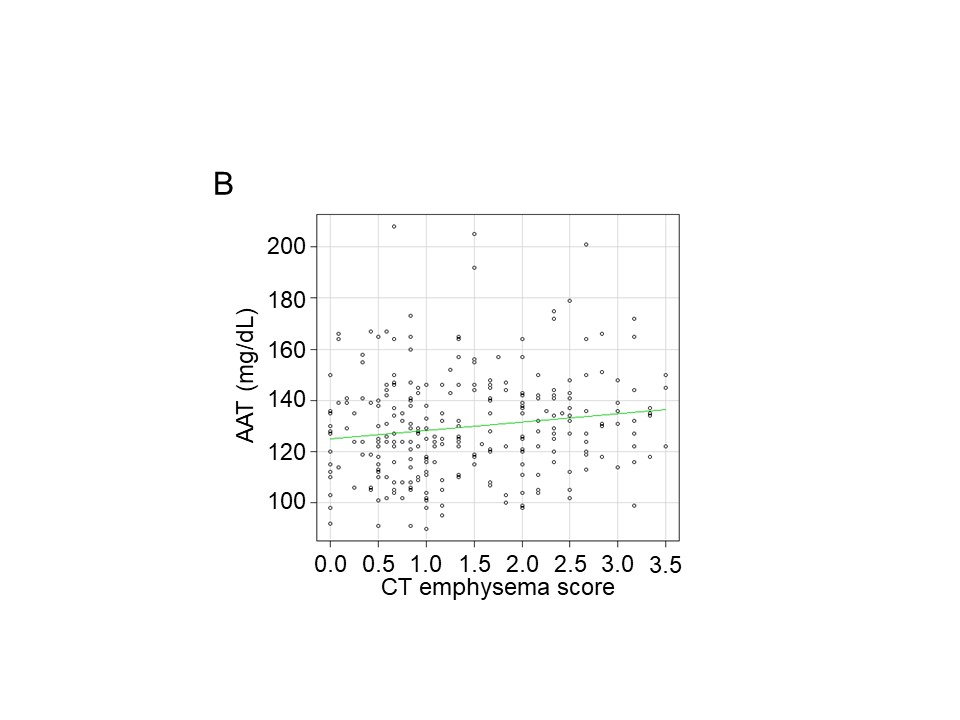
**

**Supplementary figure 1** Spearman’s correlations between serum AAT levels and clinical parameters.

(A) Body mass index (ρ = -0.21, p < 0.01) and (B) CT emphysema score (ρ = 0.15, p = 0.01)

**Abbreviations:** AAT, alpha-1 antitrypsin; CT, computed tomography


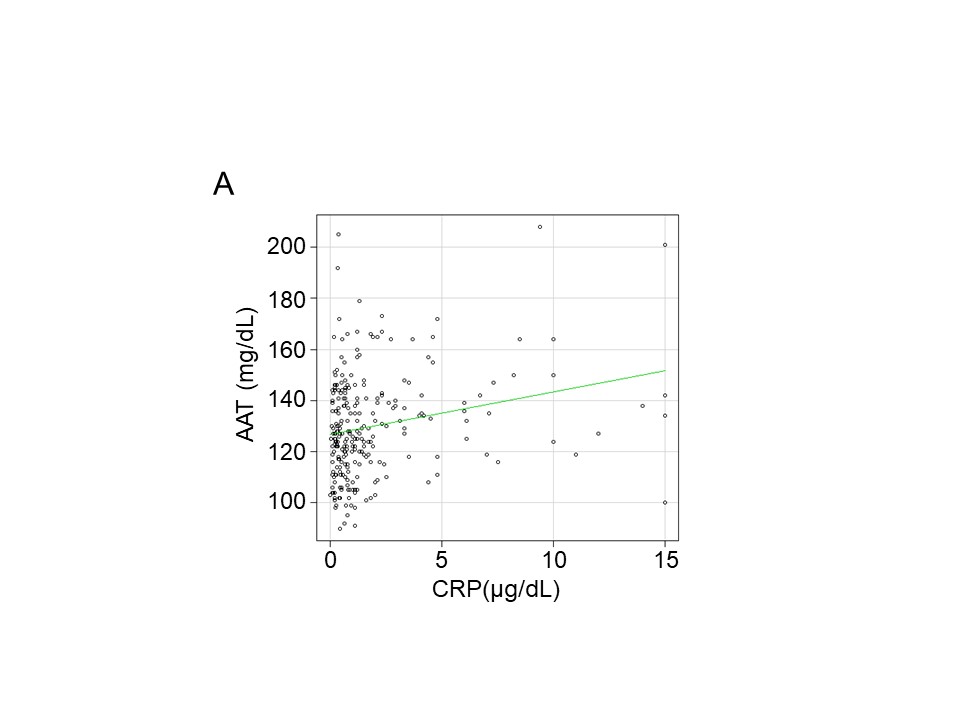


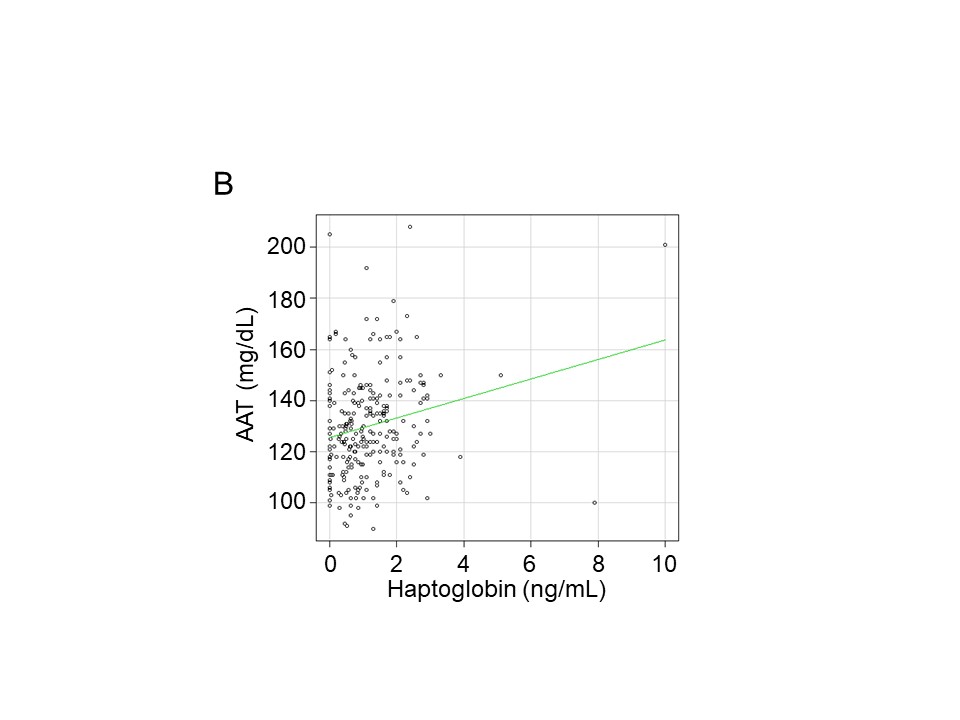


**Supplementary figure 2** Spearman’s correlations between serum AAT levels and other

inflammatory markers.

(A) C-reactive protein (ρ = 0.20, p = 0.001), (B) haptoglobin (ρ = 0.18, p = 0.003), (C) blood neutrophil counts (ρ = 0.16, p = 0.006)

**Abbreviations:** AAT, alpha-1 antitrypsin; CRP. C-reactive protein
